# Supplementary material for: Analytical validation of the PAM50-based Prosigna Breast Cancer Prognostic Gene Signature Assay and nCounter Analysis System using formalin-fixed paraffin-embedded breast tumor specimens
Source: PubMed Central journal article supplement (PMC4008304; doi:10.1186/1471-2407-14-177), 2014-03-13

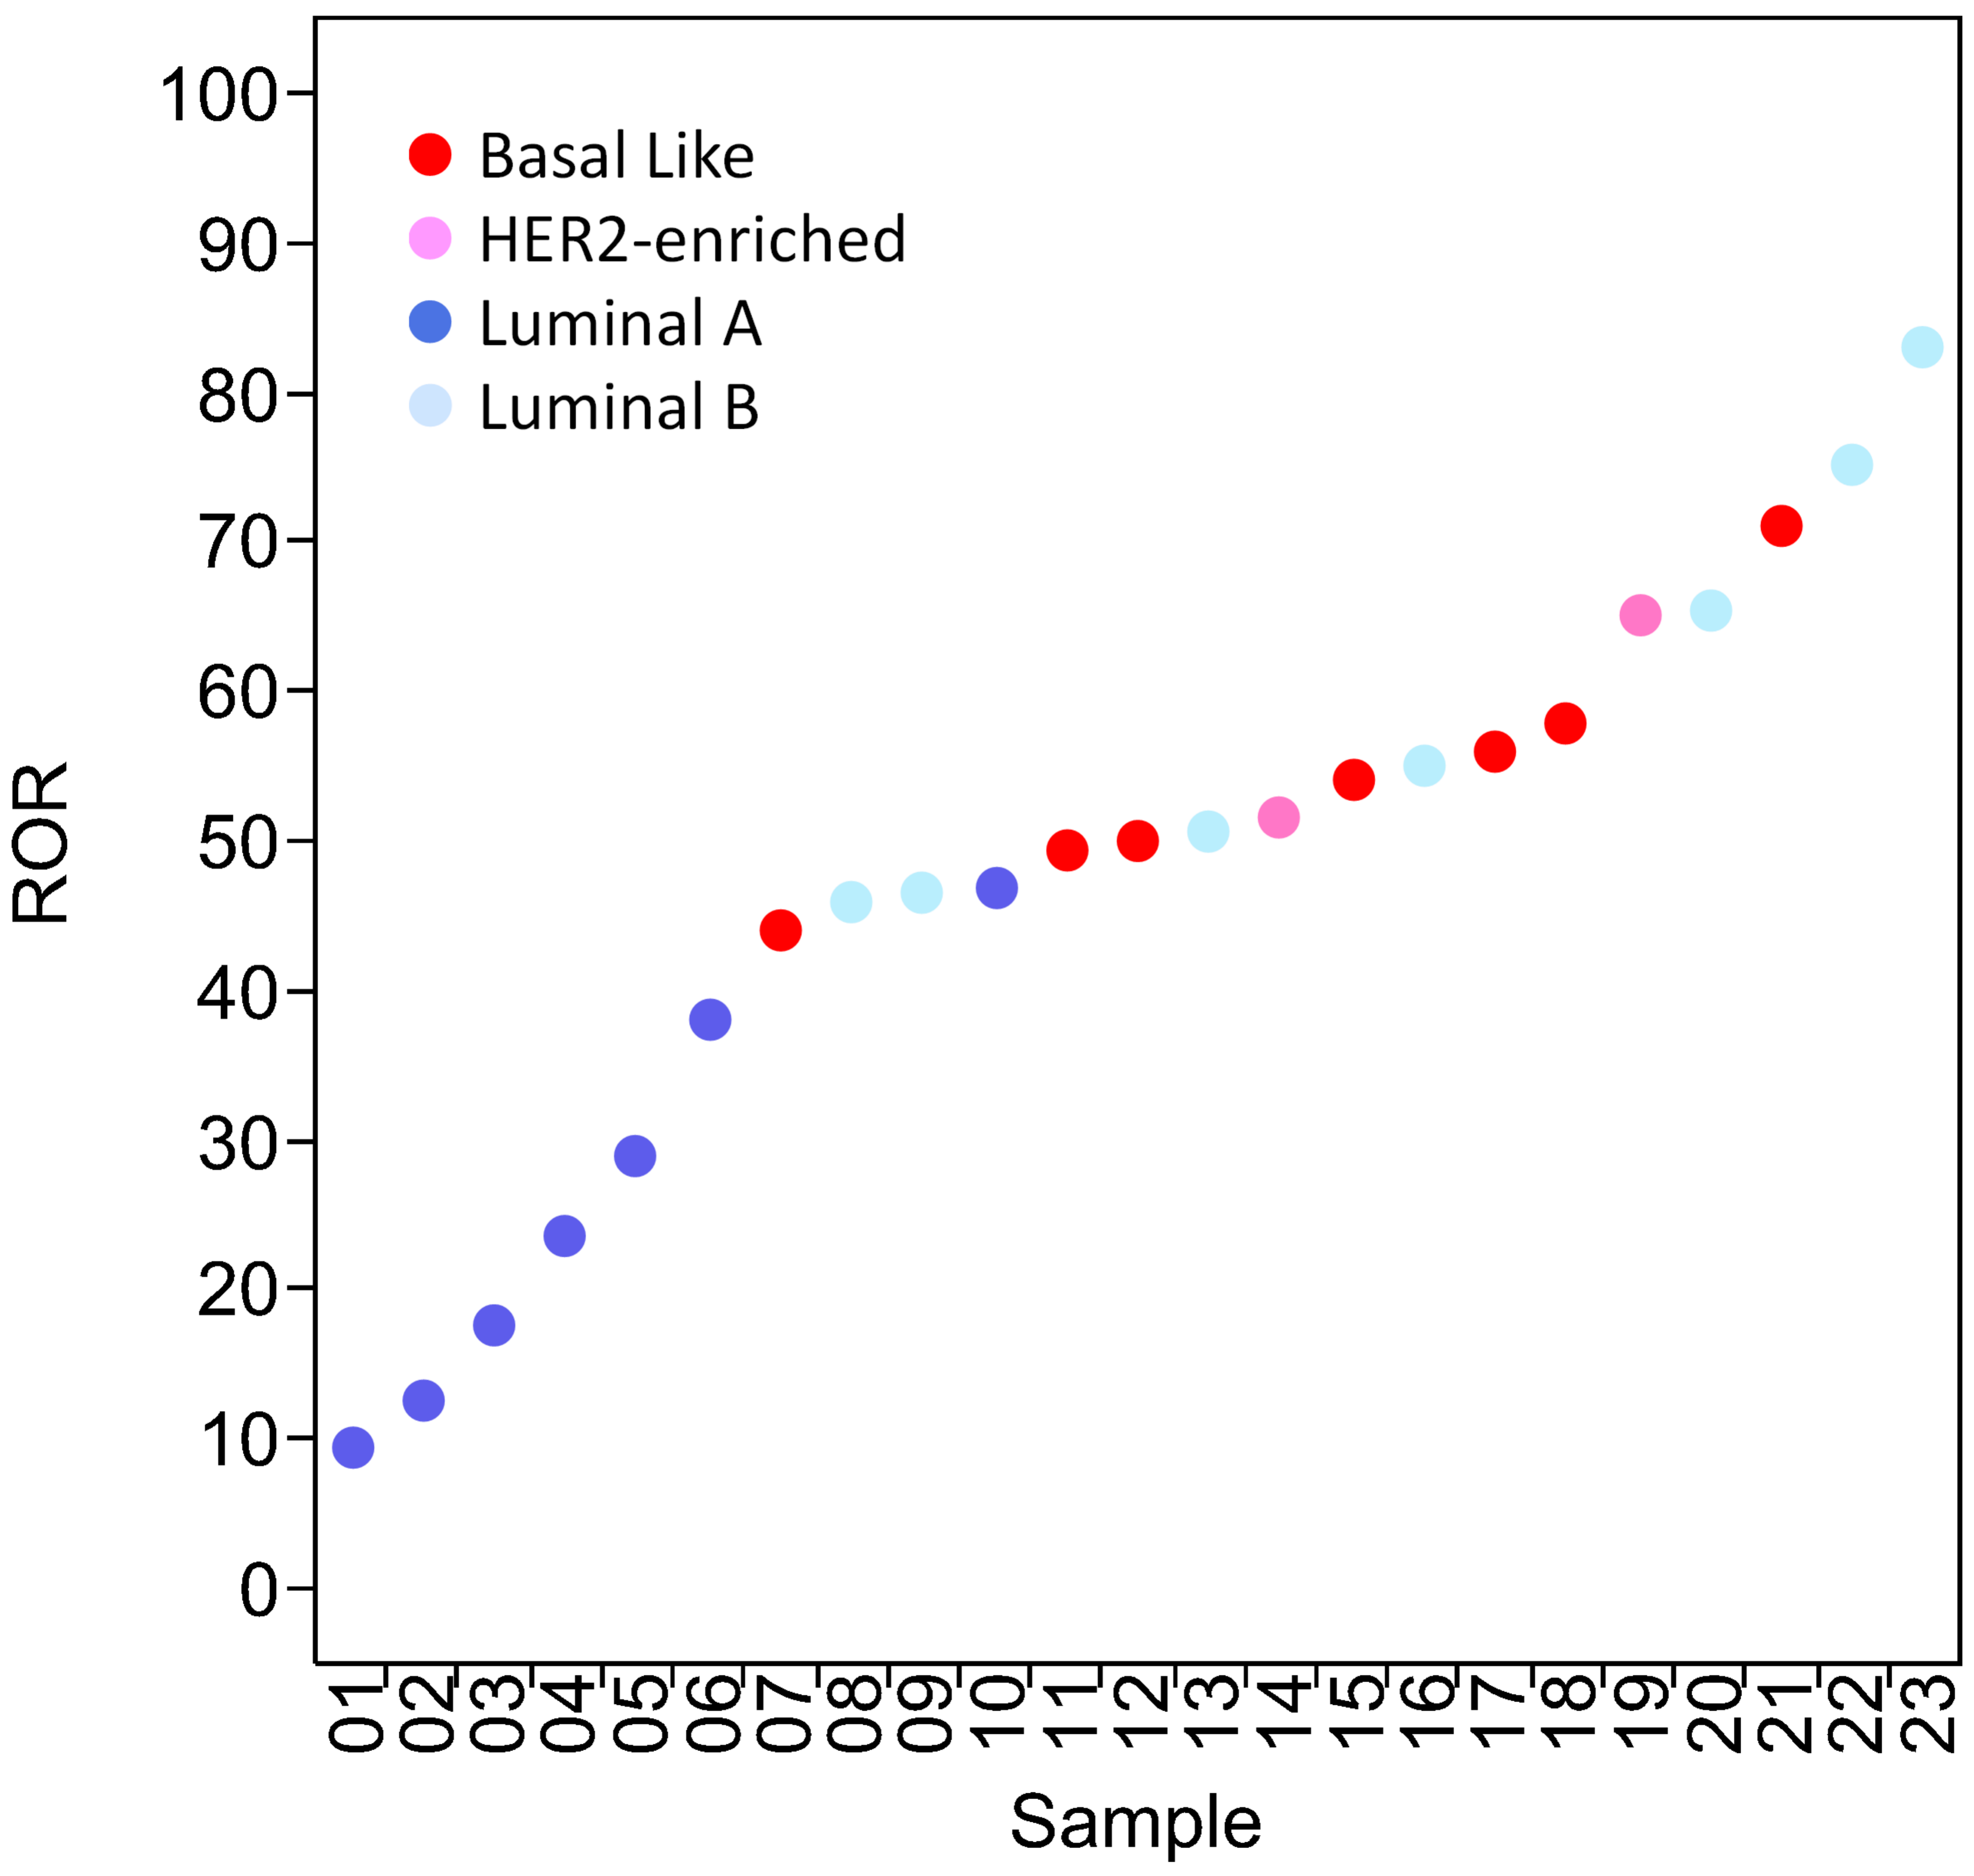

Supplement: 1471-2407-14-177-S5.pdf [file 1471-2407-14-177-S5.pdf]
